# Supplementary material for: Sex differences in cardiometabolic risk factors, pharmacological treatment and risk factor control in type 2 diabetes: findings from the Dutch Diabetes Pearl cohort
Source: PubMed Central journal article supplement (PMC7539590; doi:10.1136/bmjdrc-2020-001365), 2020-10-06
Supplement: bmjdrc-2020-001365supp001.pdf [file bmjdrc-2020-001365supp001.pdf]

**Supplementary table 1. Categorization of pharmacological management.**

|                                                       | <b>Pharmacological management of hyperglycaemia</b>              | <b>Pharmacological management of hypertension</b>                                      | <b>Pharmacological management of hyperlipidaemia</b>                                      |
|-------------------------------------------------------|------------------------------------------------------------------|----------------------------------------------------------------------------------------|-------------------------------------------------------------------------------------------|
| <b>1.</b> No treatment and no treatment indication    | • HbA1c $\leq$ 53mmol/mol                                        | • SBP $\leq$ 140mmHg<br><br>• Low or medium 10-year CVD risk and SBP >140mmHg          | • LDL-c $\leq$ 2.5mmol/L<br><br>• Low or medium 10-year CVD risk and LDL-c >2.5mmol/L     |
| <b>2.</b> Optimal treatment                           | • Use of glucose-lowering medication and HbA1c $\leq$ 53mmol/mol | • Use of antihypertensive medication and SBP $\leq$ 140mmHg                            | • Use of lipid-modifying medication and LDL-c $\leq$ 2.5mmol/L                            |
| <b>3.</b> Suboptimal treatment                        | • Use of glucose-lowering medication and HbA1c >53mmol/mol       | • Use of antihypertensive medication and SBP >140mmHg                                  | • Use of lipid-modifying medication and LDL-c >2.5mmol/L                                  |
| <b>4.</b> No treatment despite a treatment indication | • No use of glucose-lowering medication and HbA1c >53mmol/mol    | • No use of antihypertensive medication despite high 10-year CVD risk and SBP >140mmHg | • No use of lipid-modifying medication despite high 10-year CVD risk and LDL-c >2.5mmol/L |

LDL-c = low-density lipoprotein-cholesterol; SBP = systolic blood pressure; CVD = cardiovascular diseases.

**Supplementary table 2. Overview of missing data after exclusion of participants with missing data on sex (n=29).**

|                                                                | <b>Men</b><br><i>n</i> =3,969 | <b>Women</b><br><i>n</i> =2,668 |
|----------------------------------------------------------------|-------------------------------|---------------------------------|
| Age                                                            | 0 (0%)                        | 0 (0%)                          |
| Educational level                                              | 274 (6.9%)                    | 202 (7.6%)                      |
| HbA <sub>1c</sub>                                              | 116 (2.9%)                    | 54 (2.0%)                       |
| Systolic blood pressure                                        | 35 (0.9%)                     | 34 (1.3%)                       |
| Diastolic blood pressure                                       | 35 (0.9%)                     | 35 (1.3%)                       |
| Total cholesterol                                              | 99 (2.5%)                     | 41 (1.5%)                       |
| LDL-C                                                          | 190 (4.8%)                    | 82 (3.1%)                       |
| HDL-C                                                          | 118 (3.0%)                    | 56 (2.1%)                       |
| Triglycerides                                                  | 113 (2.8%)                    | 59 (2.2%)                       |
| BMI                                                            | 339 (8.5%)                    | 251 (9.4%)                      |
| CVD risk score                                                 | 403 (10.2%)                   | 285 (10.7%)                     |
| Health care centre                                             | 30 (0.8%)                     | 25 (0.9%)                       |
| Cardiovascular history                                         | 406 (10.2%)                   | 404 (15.1%)                     |
| Smoking status                                                 | 440 (11.1%)                   | 272 (10.2%)                     |
| Lipid-modifying medication                                     | 91 (2.3%)                     | 77 (2.9%)                       |
| Antihypertensive medication                                    | 91 (2.3%)                     | 77 (2.9%)                       |
| Glucose-lowering medication                                    | 91 (2.3%)                     | 77 (2.9%)                       |
| Antithrombotic medication                                      | 91 (2.3%)                     | 77 (2.9%)                       |
| Pharmacological treatment and achievement of treatment targets |                               |                                 |
| <i>Hyperglycaemia</i>                                          | 192 (4.8%)                    | 123 (4.6%)                      |

|                      |            |            |
|----------------------|------------|------------|
| <i>Hypertension</i>  | 171 (4.3%) | 133 (5.0%) |
| <i>Dyslipidaemia</i> | 324 (8.2%) | 201 (7.5%) |

LDL-c = low-density lipoprotein-cholesterol; HDL-c = high-density lipoprotein-cholesterol;  
BMI = body mass index; CVD = cardiovascular diseases.

**Supplementary table 3. Age- and medication adjusted linear regression analyses presenting mean differences in cardiometabolic risk factors stratified according to cardiovascular history, health care centre, age, BMI and educational level.**

|                              | Total                   |                              | Cardiovascular history  |                         |                  | Health care centre      |                         |                   | Age                     |                         |                  | BMI                     |                         |                  | Educational level       |                         |                         |
|------------------------------|-------------------------|------------------------------|-------------------------|-------------------------|------------------|-------------------------|-------------------------|-------------------|-------------------------|-------------------------|------------------|-------------------------|-------------------------|------------------|-------------------------|-------------------------|-------------------------|
|                              | Age-adjusted            | Age- and medication-adjusted | No CVD                  | CVD                     | Sex* CVD p-value | Primary care            | Secondary/tertiary care | Sex* Care p-value | <60 Years               | ≥60 Years               | Sex* age p-value | <25kg/m <sup>2</sup>    | ≥25kg/m <sup>2</sup>    | Sex* BMI p-value | Low                     | Middle                  | High                    |
| BMI, kg/m <sup>2</sup>       | 1.65<br>(1.33;1.96)*    | NA                           | 1.66*<br>(1.27;2.06)    | 2.01*<br>(1.46;2.56)    | 0.275            | 1.21*<br>(0.83;1.59)    | 2.25*<br>(1.72;2.78)    | 0.002*            | 1.79*<br>(1.21;2.37)    | 1.60*<br>(1.22;1.98)    | 0.570            | NA                      | NA                      | NA               | 2.13*<br>(1.58;2.67)    | 1.29*<br>(0.80;1.78)    | 0.49<br>(-0.22;1.20)    |
| HbA <sub>1c</sub> , mmol/mol | 0.41<br>(-38;1.19)      | 0.31<br>(-0.38;1.00)         | 0.23<br>(-0.58;1.05)    | 0.83<br>(-0.43;2.09)    | 0.375            | -0.36<br>(-1.08;0.35)   | 1.18<br>(-0.06;2.42)    | 0.025*            | 0.62<br>(-0.69;1.92)    | 0.15<br>(-0.63;0.93)    | 0.541            | 0.11<br>(-1.70;1.91)    | 0.34<br>(-0.40;1.09)    | 0.827            | 0.11<br>(-1.06;1.28)    | 0.35<br>(-0.67;1.37)    | 0.50<br>(-1.16;2.17)    |
| Systolic BP, mmHg            | -0.65<br>(-1.80;0.40)   | -0.71<br>(-1.76;0.34)        | -1.79*<br>(-3.02;-0.56) | 0.80<br>(-1.15;2.71)    | 0.020*           | -0.12<br>(-1.46;1.23)   | -1.53<br>(-3.16;0.11)   | 0.223             | -1.92*<br>(-3.55;-0.29) | -0.16<br>(-1.53;1.22)   | 0.118            | -0.86<br>(-3.81;2.10)   | -0.66<br>(-1.77;0.46)   | 0.836            | -0.48<br>(-2.24;1.28)   | 0.08<br>(-1.49;1.65)    | -4.34*<br>(-6.89;-1.80) |
| Diastolic BP, mmHG           | -2.01*<br>(-2.58;-1.43) | -2.02*<br>(-2.60;-1.45)      | -2.63*<br>(-3.30;-1.96) | -1.50*<br>(-2.56;-0.44) | 0.054            | -2.71*<br>(-3.42;-2.00) | -1.29*<br>(-2.22;-0.36) | 0.010*            | -1.60*<br>(-2.54;-0.66) | -2.20*<br>(-2.93;-1.47) | 0.303            | -1.07<br>(-2.63;0.49)   | -2.15*<br>(-2.77;-1.54) | 0.236            | -1.50*<br>(-2.45;-0.54) | -2.05*<br>(-2.91;-1.18) | -2.89*<br>(-4.29;-1.49) |
| TC, mmol/mol                 | 0.41*<br>(0.35;0.47)    | 0.37*<br>(0.31;0.42)         | 0.31*<br>(0.24;0.38)    | 0.46*<br>(0.36;0.55)    | 0.026*           | 0.41*<br>(0.34;0.48)    | 0.31*<br>(0.22;0.41)    | 0.081             | 0.24*<br>(0.14;0.34)    | 0.44*<br>(0.37;0.51)    | 0.001*           | 0.43*<br>(0.29;0.57)    | 0.35*<br>(0.29;0.42)    | 0.409            | 0.37*<br>(0.27;0.47)    | 0.35*<br>(0.26;0.43)    | 0.45*<br>(0.32;0.58)    |
| LDL-c, mmol/mol              | 0.24*<br>(0.19;0.28)    | 0.20*<br>(0.15;0.24)         | 0.15*<br>(0.09;0.20)    | 0.29*<br>(0.21;0.36)    | 0.008*           | 0.18*<br>(0.12;0.24)    | 0.22*<br>(0.15;0.29)    | 0.496             | 0.13*<br>(0.05;0.20)    | 0.24*<br>(0.18;0.29)    | 0.024*           | 0.12*<br>(0.00;0.23)    | 0.21*<br>(0.16;0.25)    | 0.166            | 0.18*<br>(0.10;0.25)    | 0.19*<br>(0.12;0.26)    | 0.28*<br>(0.17;0.38)    |
| HDL-c standardized           | 0.03*<br>(0.01;0.05)    | 0.02*<br>(0.00;0.04)         | 0.02<br>(-0.01;0.04)    | 0.02<br>(-0.02;0.05)    | 0.964            | 0.02<br>(-0.01;0.04)    | 0.03<br>(-0.00;0.06)    | 0.494             | 0.03<br>(-0.01;0.06)    | 0.02<br>(-0.01;0.44)    | 0.728            | 0.12*<br>(0.05;0.19)    | 0.01<br>(-0.01;0.03)    | <0.001*          | 0.01<br>(-0.02;0.04)    | 0.05*<br>(0.02;0.08)    | 0.04<br>(-0.01;0.09)    |
| Log-triglycerides, mmol/mol  | -0.05*<br>(-0.08;-0.02) | -0.04*<br>(-0.07;-0.01)      | -0.03<br>(-0.07;0.01)   | -0.04<br>(-0.09;0.02)   | 0.964            | 0.03<br>(-0.01;0.06)    | -0.12*<br>(-0.18;-0.07) | <0.001*           | -0.13*<br>(-0.19;-0.07) | 0.01<br>(-0.02;0.05)    | <0.001*          | -0.03<br>(-0.11;0.06)   | -0.04*<br>(-0.08;-0.01) | 0.798            | 0.02<br>(-0.03;0.07)    | -0.09*<br>(-0.14;-0.05) | -0.08*<br>(-0.16;0.01)  |
| TC/HDL-c, ratio              | -0.31*<br>(-0.39;-0.24) | -0.34*<br>(-0.41;-0.26)      | -0.35*<br>(-0.44;-0.26) | -0.25*<br>(-0.38;-0.12) | 0.208            | -0.26*<br>(-0.34;-0.17) | -0.43*<br>(-0.56;-0.30) | 0.015*            | -0.54*<br>(-0.68;-0.42) | -0.21*<br>(-0.29;-0.12) | <0.001*          | -0.35*<br>(-0.50;-0.19) | -0.33*<br>(-0.41;-0.25) | 0.809            | -0.31*<br>(-0.45;-0.18) | -0.40*<br>(-0.51;-0.29) | -0.33*<br>(-0.49;-0.16) |

The analyses stratified for CVD, health care setting, and educational status were age and medication-adjusted, and the analyses stratified for age were only medication-adjusted (HbA<sub>1c</sub> adjusted for glucose-lowering medication; lipid-spectrum adjusted for lipid-modifying medication and blood pressure adjusted for antihypertensive medication). Analyses stratified for BMI were only age-adjusted. Individuals with missing data on cardiovascular history, health care centre, age, BMI or educational level were excluded in

overall and subgroup analyses so that the separate analyses were comparable. BP = blood pressure; TC = total cholesterol; LDL-c = low-density lipoprotein-cholesterol; HDL-c = high-density lipoprotein-cholesterol; BMI = body mass index; NA = not applicable. \* = significant. Men = reference.

**Supplementary table 4. Age-adjusted poisson regression analyses presenting relative risks for treatment and control stratified according to cardiovascular history, health care centre, age, BMI and educational level.**

|                                                                               | Not receiving treatment                         |               |                   |                        |                   |                  |                   |                         |                   |                  |                  |                  |                      |                      |                  |                   |                   |                   |                        |
|-------------------------------------------------------------------------------|-------------------------------------------------|---------------|-------------------|------------------------|-------------------|------------------|-------------------|-------------------------|-------------------|------------------|------------------|------------------|----------------------|----------------------|------------------|-------------------|-------------------|-------------------|------------------------|
|                                                                               | Total                                           |               |                   | Cardiovascular history |                   |                  | Care setting      |                         |                   | Age              |                  |                  | BMI                  |                      |                  | Educational level |                   |                   |                        |
|                                                                               | Total (%)                                       | Women vs. men | RR (95% CI)       | No CVD                 | CVD               | Sex* CVD p-value | Primary care      | Secondary/tertiary care | Sex* Care p-value | <60              | ≥60              | Sex* age p-value | <25kg/m <sup>2</sup> | ≥25kg/m <sup>2</sup> | Sex* BMI p-value | Low               | Middle            | High              | Sex* Education p-value |
| No glucose-lowering medication despite HbA <sub>1c</sub> >53mmol/mol          | 2,315 (4%)                                      | 4% vs. 4%     | 0.96 (0.63;1.46)  | 1.09 (0.66;1.78)       | 0.62 (0.26;1.45)  | 0.259            | 1.05 (0.66;1.67)  | 0.80 (0.32;2.02)        | 0.613             | 1.09 (0.52;2.26) | 0.92 (0.55;1.54) | 0.711            | 1.41 (0.36;5.51)     | 0.92 (0.59;1.43)     | 0.565            | 0.79 (0.40;1.57)  | 1.48* (0.76;2.89) | 0.63 (0.22;1.81)  | 0.981                  |
| No antihypertensive medication despite high CVD risk and systolic BP >140mmHg | 2,332 (24%)                                     | 21% vs. 25%   | 0.85* (0.73;1.00) | 0.77* (0.64;0.92)      | 1.00 (0.73;1.38)  | 0.152            | 0.73* (0.61;0.88) | 1.12 (0.85;1.49)        | 0.013*            | 0.82 (0.59;1.14) | 0.86 (0.72;1.02) | 0.812            | 0.77 (0.54;1.08)     | 0.87 (0.73;1.04)     | 0.522            | 0.74* (0.56;0.97) | 0.95 (0.75;1.20)  | 1.27 (0.92;1.76)  | 0.008*                 |
| No antihypertensive drugs despite systolic blood pressure >140mmHg            | 2,605 (25%)                                     | 24% vs. 26%   | 0.90 (0.78;1.03)  | 0.82* (0.71;0.95)      | 1.00 (0.73;1.38)  | 0.292            | 0.78* (0.66;0.92) | 1.15 (0.90;1.47)        | 0.007*            | 0.94 (0.73;1.20) | 0.89 (0.75;1.06) | 0.453            | 0.82 (0.61;1.11)     | 0.90 (0.78;1.05)     | 0.655            | 0.74* (0.57;0.95) | 0.99 (0.81;1.21)  | 1.36* (1.03;1.80) | 0.001*                 |
| No lipid-modifying medication despite high CVD risk and LDL-c >2.5mmol/L      | 1,420 (52%)                                     | 53% vs. 52%   | 1.03 (0.94;1.14)  | 0.94 (0.83;1.05)       | 1.26* (1.03;1.53) | 0.011*           | 0.93 (0.82;1.04)  | 1.28* (1.08;1.53)       | 0.003*            | 1.03 (0.87;1.23) | 1.04 (0.92;1.17) | 0.993            | 0.91 (0.71;1.16)     | 1.06 (0.95;1.18)     | 0.276            | 0.96 (0.81;1.15)  | 1.04 (0.89;1.21)  | 1.17 (0.95;1.43)  | 0.205                  |
| No lipid-lowering drugs despite LDL-c >2.5mmol/L                              | 1,803 (54%)                                     | 55% vs. 52%   | 1.06 (0.97;1.15)  | 0.99 (0.90;1.08)       | 1.26* (1.03;1.53) | 0.027*           | 0.95 (0.86;1.06)  | 1.27* (1.09;1.47)       | 0.002*            | 1.12 (0.99;1.26) | 1.02 (0.90;1.15) | 0.290            | 1.05 (0.86;1.29)     | 1.06 (0.96;1.16)     | 0.965            | 0.98 (0.84;1.15)  | 1.07 (0.94;1.21)  | 1.18 (0.99;1.41)  | 0.133                  |
|                                                                               | Treatment and attainment of risk factor targets |               |                   |                        |                   |                  |                   |                         |                   |                  |                  |                  |                      |                      |                  |                   |                   |                   |                        |

|                                                               | Total       |               |                   | Cardiovascular history |                   |                 | Care setting      |                         |                  | Age               |                   |                 | BMI                  |                      |                 | Education         |                   |                   |                       |
|---------------------------------------------------------------|-------------|---------------|-------------------|------------------------|-------------------|-----------------|-------------------|-------------------------|------------------|-------------------|-------------------|-----------------|----------------------|----------------------|-----------------|-------------------|-------------------|-------------------|-----------------------|
|                                                               | Total (%)   | Women vs. men | RR (95% CI)       | No CVD                 | CVD               | Sex*CVD p-value | Primary care      | Secondary/tertiary care | Sex*Care p-value | <60               | ≥60               | Sex*age p-value | <25kg/m <sup>2</sup> | ≥25kg/m <sup>2</sup> | Sex*BMI p-value | Low               | Middle            | High              | Sex*Education p-value |
| Glucose-lowering medication and HbA <sub>1c</sub> ≤53mmol/mol | 4,212 (47%) | 44% vs. 49%   | 0.89* (0.83;0.96) | 0.91* (0.84;0.99)      | 0.80 (0.71;0.91)* | 0.095           | 0.96 (0.89;1.03)  | 0.80* (0.71;0.90)       | 0.014*           | 0.86* (0.76;0.97) | 0.91* (0.84;0.99) | 0.386           | 0.93 (0.79;1.08)     | 0.89* (0.82;0.95)    | 0.593           | 0.95 (0.84;1.06)  | 0.91 (0.82;1.01)  | 0.83* (0.70;0.98) | 0.298                 |
| Antihypertensive medication and systolic BP ≤140mmHg          | 3,478 (44%) | 45% vs. 44%   | 1.02 (0.94;1.09)  | 1.10 (0.99;1.21)       | 0.95 (0.84;1.06)  | 0.050           | 0.97 (0.88;1.08)  | 1.05 (0.94;1.17)        | 0.372            | 1.07 (0.96;1.19)  | 0.99 (0.89;1.10)  | 0.310           | 0.99 (0.79;1.23)     | 1.02 (0.94;1.10)     | 0.794           | 0.96 (0.85;1.09)  | 0.99 (0.88;1.10)  | 1.34* (1.13;1.58) | 0.008*                |
| Lipid-modifying medication and LDL-c ≤2.5mmol/L               | 3,324 (75%) | 70% vs. 78%   | 0.90* (0.86;0.94) | 0.91* (0.86;0.96)      | 0.89* (0.83;0.96) | 0.668           | 0.89* (0.84;0.94) | 0.91* (0.86;0.98)       | 0.576            | 0.95* (0.88;1.02) | 0.88* (0.83;0.93) | 0.099           | 0.96 (0.86;1.08)     | 0.89* (0.85;0.93)    | 0.231           | 0.90* (0.84;0.96) | 0.91* (0.85;0.97) | 0.85* (0.75;0.96) | 0.561                 |

The analyses stratified for cardiovascular history, health care setting, BMI, and educational level were age-adjusted, and the analyses stratified for age were unadjusted. Individuals with missing data on cardiovascular history, health care centre, age, BMI or educational level were excluded in overall and subgroup analyses, so that the separate analyses were comparable. Total refers to the total number of participants included in the analyses and (%) refers to the number of participants with the outcome of interest. CVD = cardiovascular disease; BP = blood pressure; LDL-c = low-density lipoprotein-cholesterol. \* = significant. Men = reference.
